# Supplementary material
Source: Springer Nature journal article supplement (https://www.springermedizin.de/resource/supplementary/13041_2010_85_MOESM2_ESM.pdf/25657488)

**A**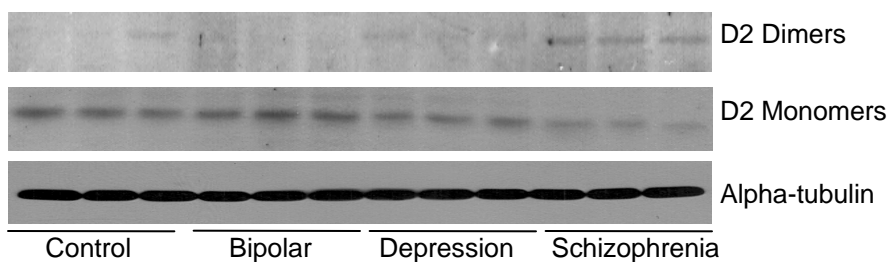**B**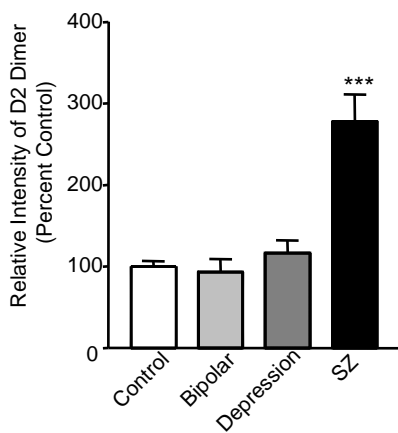**C**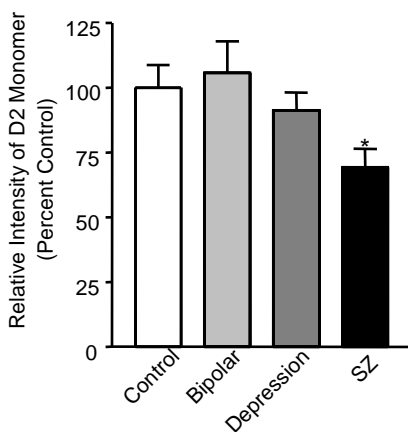**D**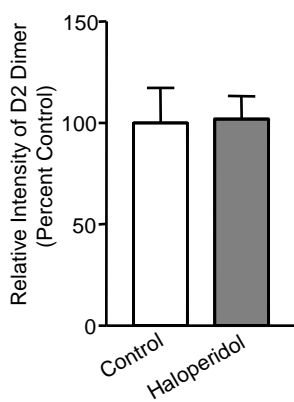**E**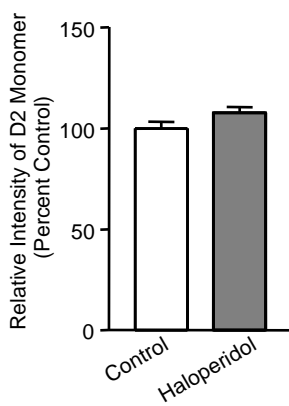**F**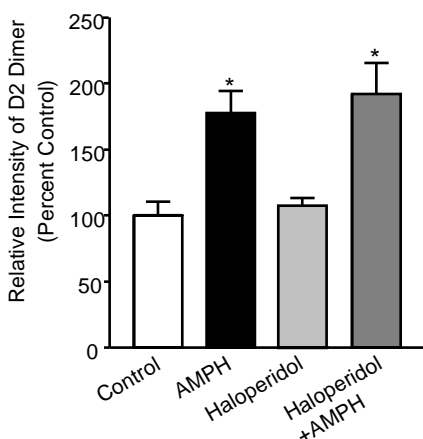**G**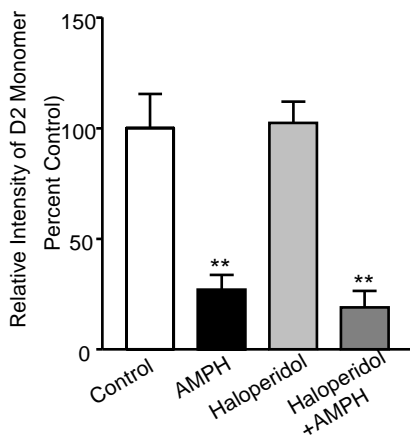

Supplement: MOESM2 [file 25657488]
